# Supplementary material for: Prevalence and risk distribution of schistosomiasis among adults in Madagascar: a cross-sectional study
Source: PubMed Central journal article supplement (PMC10127445; doi:10.1186/s40249-023-01094-z), 2023-04-25
Supplement: 40249_2023_1094_MOESM1_ESM.pdf [file 40249_2023_1094_MOESM1_ESM.pdf]

**Supplementary Table 1. Mobility history of co-infected participants.** In orange: *S. haematobium* endemic, in green: *S. mansoni* endemic

| <b>Study Site</b>                    | <b>Place of birth</b> | <b>Place of home</b> |
|--------------------------------------|-----------------------|----------------------|
| <b>Ankazomborona (north-western)</b> | Fianarantsoa          | Ambondromamy         |
|                                      | Ambararata fotsy      | Ambonara             |
|                                      | Ambohimahasoa         | Amboromalandy kely   |
|                                      | Ambositra             | Ambonara             |
|                                      | Ankazomborona         | Amboromalandy kely   |
|                                      | Ankazomborona         | Madiromiongana       |
|                                      | Ankazomborona         | Madirovalo           |
|                                      | Bekarara Ambony       | Amboromalandy        |
|                                      | Fianarantsoa          | Ambondromamy         |
|                                      | Fianarantsoa          | Ambormalandy kely    |
|                                      | Fianarantsoa          | Amboromalandy kely   |
|                                      | Madiromiongana        | Madiromiongana       |
|                                      | Madiromiongana        | Madiromiongana       |
|                                      | Maromanihy            | Ambonara             |
| Marovoay                             | Madirovalo            |                      |
| Tsaravotra Tsaratanana               | Amboromalandy         |                      |
| <b>Tsiroanomandidy (central)</b>     | Belohitsiribihina     | Tsaratanàna          |
|                                      | Tsaratanàna           | Tsaratanàna          |
|                                      | Tsiroanomandidy       | Androtra             |
| <b>Andina (central)</b>              | Andina                | Ampasina             |
|                                      | Andina                | Ampasina             |
|                                      | Andina                | Ampasina             |
|                                      | Andina                | Ampasina             |
|                                      | Andina                | Ampasina             |
